# Supplementary material for: Modelling the spatial spread of a homing endonuclease gene in a mosquito population
Source: PubMed Central journal article supplement — J Appl Ecol. 2013 Jul 23;50(5):1216–25. doi: 10.1111/1365-2664.12133 (PMC4277857; doi:10.1111/1365-2664.12133), 2013-07-23
Supplement: JPE-50-1216-s002.pdf [file JPE-50-1216-s002.pdf]

**Table S1:** Model parameters. The default values are obtained from a variety of sources (Gwadz and Collins, 1996; Smith and McKenzie, 2004; Tuno et al., 2005; Afrane et al., 2005; Chen et al., 2006); where no estimates were available values were varied within what we believe are plausible limits.

| Parameter                                                                                                                                                                                                                             | Symbol       | Default value                                                         |
|---------------------------------------------------------------------------------------------------------------------------------------------------------------------------------------------------------------------------------------|--------------|-----------------------------------------------------------------------|
| <b>Parameters used in non-spatial models</b>                                                                                                                                                                                          |              |                                                                       |
| Egg laying rate                                                                                                                                                                                                                       | $\nu$        | 0.12 (day <sup>-1</sup> C <sub>O</sub> <sup>-1</sup> )*               |
| Feeding rate                                                                                                                                                                                                                          | $\gamma_H$   | 0.015 (day <sup>-1</sup> C <sub>H</sub> <sup>-1</sup> )**             |
| Egg load after feeding                                                                                                                                                                                                                | $\kappa$     | 120                                                                   |
| Rate of mortality from competition                                                                                                                                                                                                    | $\alpha$     | 0.05 (day <sup>-1</sup> n <sub>J</sub> <sup>-1</sup> )†               |
| Background mortality from stage $X \in \{J, U, M, H, O\}$                                                                                                                                                                             | $\mu_X$      | 0.1 (∀X, day <sup>-1</sup> )                                          |
| Rate of juvenile maturation                                                                                                                                                                                                           | $\gamma_J$   | 0.1 (day <sup>-1</sup> )                                              |
| Mating rate                                                                                                                                                                                                                           | $m^\ddagger$ | 0.01 (day <sup>-1</sup> C <sup>-1</sup> )‡                            |
| Rate of HEG cleavage (X-shredder) or homing (classical HEG)                                                                                                                                                                           | $e$          | 0.6 (generation <sup>-1</sup> )                                       |
| <b>Demographic parameters exclusive to spatial models</b>                                                                                                                                                                             |              |                                                                       |
| Mean number of eggs laid per oviposition                                                                                                                                                                                              | $\omega$     | 40                                                                    |
| Maximum mating distance                                                                                                                                                                                                               | $s_M$        | 0.3 (km)                                                              |
| Feeding site detection distance                                                                                                                                                                                                       | $s_H$        | 0.5 (km)                                                              |
| Breeding site detection distance                                                                                                                                                                                                      | $s_O$        | 0.15 (km)                                                             |
| Basic jump rate                                                                                                                                                                                                                       | $r$          | 10 (day <sup>-1</sup> )                                               |
| Maximum jump distance                                                                                                                                                                                                                 | $s_G$        | 0.3 (km)                                                              |
| Strength of the reduction in movement near the object of search                                                                                                                                                                       | $\beta$      | 10                                                                    |
| <b>Environmental parameters</b>                                                                                                                                                                                                       |              |                                                                       |
| Mean density of feeding sites                                                                                                                                                                                                         | $\theta_A$   | (2 <sup>1.5</sup> , 2 <sup>3.5</sup> ) (km <sup>-2</sup> ; pt.A,pt.B) |
| Mean density of breeding sites                                                                                                                                                                                                        | $\theta_B$   | (64, 2 <sup>6.5</sup> ) (km <sup>-2</sup> ; pt.A,pt.B)                |
| Breeding site turnover rate                                                                                                                                                                                                           | $\sigma$     | 0.05 (day <sup>-1</sup> )                                             |
| Covariance between feeding and breeding sites                                                                                                                                                                                         | $\rho$       | 0                                                                     |
| Covariance length scale                                                                                                                                                                                                               | $s_\rho$     | 0.5 (km)                                                              |
| Mean density of sample points                                                                                                                                                                                                         | $\theta_C$   | 100 (km <sup>-2</sup> )                                               |
| Sample point turnover rate                                                                                                                                                                                                            | $\sigma_C$   | 0.1 (day <sup>-1</sup> )                                              |
| * In spatial models, local density of breeding sites $C_O(x)$ at a location $x$ is the number of breeding sites within distance $s_O$ of $x$ .<br>In non-spatial models, $C_O$ is defined $\theta_B \pi s_O^2 \omega / \kappa$ .      |              |                                                                       |
| ** In spatial models, local density of feeding sites $C_H(x)$ at a location $x$ is the number of feeding sites within distance $s_H$ of $x$ .<br>In non-spatial models, $C_H$ is defined $\theta_A \pi s_H^2$ .                       |              |                                                                       |
| † In spatial models, $n_J = n_{J_i}$ is the number of juveniles at a breeding site $i$ .<br>In non-spatial models, $n_J$ is set to $n'_J / \theta_B$ where $n'_J$ is density of juveniles.                                            |              |                                                                       |
| ‡ In spatial models, local density of mates $C_M(x)$ at a location $x$ is the number of mates within mating distance $s_M$ of $x$ .<br>In non-spatial models, $C_M$ is defined $C'_M \pi s_M^2$ where $C'_M$ is the density of mates. |              |                                                                       |

## References

- Afrane, Y. A., Lawson, B. W., Githeko, A. K., and Yan, G. (2005). Effects of microclimatic changes caused by land use and land cover on duration of gonotrophic cycles of *Anopheles gambiae* (Diptera: Culicidae) in western Kenya highlands. *Journal of Medical Entomology*, 42(6):974–980.
- Chen, H., Fillinger, U., and Yan, G. (2006). Oviposition behavior of female *Anopheles gambiae* in western Kenya inferred from microsatellite markers. *The American Journal of Tropical Medicine and Hygiene*, 75(2):246–250.
- Gwadz, R. and Collins, F. (1996). Anopheline mosquitoes and the agents they transmit. In Beaty, B. and Marquardt, W., editors, *The Biology of Disease Vectors*, pages 73–84. University Press of Colorado.
- Smith, D. L. and McKenzie, F. E. (2004). Statics and dynamics of malaria infection in *Anopheles* mosquitoes. *Malaria Journal*, 3(1):13.
- Tuno, N., Okeka, W., Minakawa, N., Takagi, M., and Yan, G. (2005). Survivorship of *Anopheles gambiae sensu stricto* (Diptera: Culicidae) larvae in western Kenya highland forest. *Journal of Medical Entomology*, 42(3):270–277.
