# Supplementary material for: Modelling the spatial spread of a homing endonuclease gene in a mosquito population
Source: PubMed Central journal article supplement — J Appl Ecol. 2013 Jul 23;50(5):1216–25. doi: 10.1111/1365-2664.12133 (PMC4277857; doi:10.1111/1365-2664.12133), 2013-07-23
Supplement: JPE-50-1216-s003.pdf [file JPE-50-1216-s003.pdf]

**Appendix S2:** Animations of the simulation runs plotted in Fig. 3. The blue dots represent breeding sites occupied by wildtype adult males, the red dots (yet to appear) are breeding sites occupied by adult males with the HEG transgene, and the green dots are adult feeding sites. The right-hand panel charts the corresponding dynamics.
